# Supplementary material for: The Japanese Pediatric Continuous Renal Replacement Therapy (jpCRRT) Registry: Study Protocol
Source: PubMed Central journal article supplement — Ann Clin Epidemiol. 2023 Aug 9;5(4):121–6. doi: 10.37737/ace.23016 (PMC10944986; doi:10.37737/ace.23016), 2023-08-09
Supplement: ace23016s1.pdf [file ace23016s1.pdf]

Supplementary Table. Registration Data Details

| Variable                                                        | Data input format | Options                                                                                                                                                                                 | Additional description                                                                                              |
|-----------------------------------------------------------------|-------------------|-----------------------------------------------------------------------------------------------------------------------------------------------------------------------------------------|---------------------------------------------------------------------------------------------------------------------|
| <b>Patient baseline characteristics</b>                         |                   |                                                                                                                                                                                         |                                                                                                                     |
| PICU admission day                                              | YY/MM/DD          |                                                                                                                                                                                         |                                                                                                                     |
| Birth date                                                      | YY/MM/DD          |                                                                                                                                                                                         |                                                                                                                     |
| Age (months)                                                    | None              |                                                                                                                                                                                         | Calculated from the date of birth and date of admission to PICU.                                                    |
| Gender                                                          | Binary            | Male/Female                                                                                                                                                                             |                                                                                                                     |
| Height (cm)                                                     | Numeric           |                                                                                                                                                                                         | Integer only.                                                                                                       |
| Weight (kg)                                                     | Numeric           |                                                                                                                                                                                         | Enter to the first decimal place.                                                                                   |
| Underlying disease                                              | Free description  |                                                                                                                                                                                         | If there is no underlying disease, "None" is indicated.                                                             |
| Chromosomal abnormality                                         | Binary            | No/Yes                                                                                                                                                                                  |                                                                                                                     |
| Congenital heart disease                                        | Binary            | No/Yes                                                                                                                                                                                  |                                                                                                                     |
| PCPC                                                            | 5 levels          | 1/2/3/4/5                                                                                                                                                                               |                                                                                                                     |
| Renal replacement therapy dependence                            | 3 levels          | No/Yes (hemodialysis)/<br>Yes (peritoneal dialysis)                                                                                                                                     |                                                                                                                     |
| Baseline serum creatinine (mg/dL)                               | Numeric           |                                                                                                                                                                                         | Enter to the first decimal place. If the base value is unknown, enter "0.0".                                        |
| Tracheotomized state                                            | Binary            | No/Yes                                                                                                                                                                                  | This refers to tracheotomy or laryngotracheal separation. If the tracheostomy has already been closed, select "No". |
| Use of home ventilator                                          | Binary            | No/Yes                                                                                                                                                                                  | Including non-invasive positive pressure ventilation.                                                               |
| Hematopoietic stem cell transplantation prior to PICU admission | Binary            | No/Yes                                                                                                                                                                                  |                                                                                                                     |
| Reason for PICU admission                                       | 12 levels         | Post-operative/<br>Respiratory/Circulatory/<br>Renal/Neurological/Hematological · solid tumor/Endocrine · metabolic/Infection · sepsis/Post-cardiac arrest/Trauma/Drug poisoning/Others |                                                                                                                     |
| Surgical classification                                         | 10 levels         | Not after surgery/Cardiac/<br>Gastrointestinal/Liver/Neurological/<br>Respiratory/Plastic/Orthopedic/<br>Otolaryngological/Others                                                       |                                                                                                                     |
| PIM3 at PICU admission (%)                                      | Numeric           |                                                                                                                                                                                         | Enter to the first decimal place.                                                                                   |
| pSOFA at PICU admission                                         | Numeric           |                                                                                                                                                                                         | Integer only.                                                                                                       |
| <b>CRRT initiation and initial circuit information</b>          |                   |                                                                                                                                                                                         |                                                                                                                     |

|                                                                   |           |                                                                                                                                                                                                                    |                                                                                                                                                                                                                                                                                             |
|-------------------------------------------------------------------|-----------|--------------------------------------------------------------------------------------------------------------------------------------------------------------------------------------------------------------------|---------------------------------------------------------------------------------------------------------------------------------------------------------------------------------------------------------------------------------------------------------------------------------------------|
| CRRT initiation date                                              | YY/MM/DD  |                                                                                                                                                                                                                    |                                                                                                                                                                                                                                                                                             |
| CRRT initiation time                                              | HH:MM     |                                                                                                                                                                                                                    | Enter in 24-hour notation                                                                                                                                                                                                                                                                   |
| Reason for CRRT initiation                                        | 7 levels  | Fluid overload/Acid-base·<br>electrolyte/Metabolic/Drug<br>addiction/Sepsis/Temperature control/Others                                                                                                             | Select all reasons that apply. If "others" is selected, provide details in the free description.                                                                                                                                                                                            |
| Vascular access size (Fr or G)                                    | Numeric   |                                                                                                                                                                                                                    | Integer only. If no catheter is used, e.g., directly in the ECMO circuit, enter "0".                                                                                                                                                                                                        |
| Vascular access insertion site                                    | 12 levels | Right Internal Jugular/Left Internal Jugular/Right femoral/Left femoral/<br>Right subclavian/Left subclavian/<br>Others/ECMO (pre-pump)/<br>ECMO (post-pump)/ECMO (shunt)/<br>ECMO (venous:post,arterial:pre-pump) |                                                                                                                                                                                                                                                                                             |
| ECMO concurrently with CRRT                                       | Binary    | No/Yes                                                                                                                                                                                                             |                                                                                                                                                                                                                                                                                             |
| <b>Data immediately prior to CRRT initiation</b>                  |           |                                                                                                                                                                                                                    |                                                                                                                                                                                                                                                                                             |
| Total urine output for the 24 hours prior to CRRT initiation (mL) | Numeric   |                                                                                                                                                                                                                    | Integer only. Enter the exact urine volume due to indwelling urinary catheter. If the urinary catheter was placed less than 24 hours prior to induction, estimate the 24-hour urine output using the urine output at the time it was available. If the urine volume is unknown, enter "-1". |
| Serum creatinine (mg/dL)                                          | Numeric   |                                                                                                                                                                                                                    | Enter to the first decimal place.                                                                                                                                                                                                                                                           |
| Serum blood urea nitrogen (mg/dL)                                 | Numeric   |                                                                                                                                                                                                                    | Enter to the first decimal place.                                                                                                                                                                                                                                                           |
| BGA - pH                                                          | Numeric   |                                                                                                                                                                                                                    | Enter to the second decimal place.                                                                                                                                                                                                                                                          |
| BGA - Base excess                                                 | Numeric   |                                                                                                                                                                                                                    | Enter to the first decimal place.                                                                                                                                                                                                                                                           |
| BGA - HCO <sub>3</sub> <sup>-</sup> (mEq/L)                       | Numeric   |                                                                                                                                                                                                                    | Enter to the first decimal place.                                                                                                                                                                                                                                                           |
| BGA - Sodium (mEq/L)                                              | Numeric   |                                                                                                                                                                                                                    | Integer only.                                                                                                                                                                                                                                                                               |
| BGA - Potassium (mEq/L)                                           | Numeric   |                                                                                                                                                                                                                    | Enter to the first decimal place.                                                                                                                                                                                                                                                           |
| BGA - Chloride (mEq/L)                                            | Numeric   |                                                                                                                                                                                                                    | Integer only.                                                                                                                                                                                                                                                                               |
| BGA - Lactate (mmol/L)                                            | Numeric   |                                                                                                                                                                                                                    | Enter to the first decimal place.                                                                                                                                                                                                                                                           |
| Hemoglobin (g/dL)                                                 | Numeric   |                                                                                                                                                                                                                    | Enter to the first decimal place.                                                                                                                                                                                                                                                           |
| Platelet count (/μL)                                              | Numeric   |                                                                                                                                                                                                                    | Integer only.                                                                                                                                                                                                                                                                               |
| PT (INR)                                                          | Numeric   |                                                                                                                                                                                                                    | Enter to the first decimal place.                                                                                                                                                                                                                                                           |
| APTT (sec)                                                        | Numeric   |                                                                                                                                                                                                                    | Integer only.                                                                                                                                                                                                                                                                               |
| Fibrinogen (mg/dL)                                                | Numeric   |                                                                                                                                                                                                                    | Integer only.                                                                                                                                                                                                                                                                               |

|                                                            |          |                                                                                                                                            |                                                                                                                                           |
|------------------------------------------------------------|----------|--------------------------------------------------------------------------------------------------------------------------------------------|-------------------------------------------------------------------------------------------------------------------------------------------|
| Central venous pressure (mmHg)                             | Numeric  |                                                                                                                                            | Integer only.                                                                                                                             |
| Systolic arterial pressure (mmHg)                          | Numeric  |                                                                                                                                            | Integer only.                                                                                                                             |
| Diastolic arterial pressure (mmHg)                         | Numeric  |                                                                                                                                            | Integer only.                                                                                                                             |
| Heart rate (bpm)                                           | Numeric  |                                                                                                                                            | Integer only.                                                                                                                             |
| Respiratory support                                        | 6 levels | Invasive positive pressure ventilation/Non-invasive positive pressure ventilation/High flow nasal cannula/Other oxygen therapy/Others/None |                                                                                                                                           |
| Dopamine ( $\gamma$ )                                      | Numeric  |                                                                                                                                            | Integer only.                                                                                                                             |
| Dobutamine ( $\gamma$ )                                    | Numeric  |                                                                                                                                            | Integer only.                                                                                                                             |
| Milrinone ( $\gamma$ )                                     | Numeric  |                                                                                                                                            | Enter to the first decimal place.                                                                                                         |
| Adrenaline ( $\gamma$ )                                    | Numeric  |                                                                                                                                            | Enter to the second decimal place.                                                                                                        |
| Noradrenaline ( $\gamma$ )                                 | Numeric  |                                                                                                                                            | Enter to the second decimal place.                                                                                                        |
| Vasopressin (mU/kg/min)                                    | Numeric  |                                                                                                                                            | Enter to the first decimal place.                                                                                                         |
| Priming capacity of first circuit (mL)                     | Numeric  |                                                                                                                                            | Integer only. If unknown, enter "0".                                                                                                      |
| CRRT modality                                              | 5 levels | CVVHD/CVVHDF/CVVH/ECUM/Others                                                                                                              | If "others" is selected, provide details in the free description.                                                                         |
| Hemofilter material                                        | 6 levels | PS/CTA/PMMA/AN69ST/PAN/Others                                                                                                              | If "others" is selected, provide details in the free description.                                                                         |
| Hemofilter membrane area (m <sup>2</sup> )                 | Numeric  |                                                                                                                                            | Enter to the first decimal place. If unknown, enter "0.0".                                                                                |
| Blood priming                                              | Binary   | No/Yes                                                                                                                                     |                                                                                                                                           |
| Blood priming - Red cell products (mL)                     | Numeric  |                                                                                                                                            | Describe the volume used in blood priming.                                                                                                |
| Blood priming - Albumin preparation (mL)                   | Numeric  |                                                                                                                                            | Describe the volume used in blood priming.                                                                                                |
| Blood priming – Plasma derivatives (mL)                    | Numeric  |                                                                                                                                            | Describe the volume used in blood priming.                                                                                                |
| Dialysis after blood priming and before patient connection | Binary   | No/Yes                                                                                                                                     |                                                                                                                                           |
| <b>Data immediately after CRRT initiation</b>              |          |                                                                                                                                            |                                                                                                                                           |
| Adverse event                                              | 6 levels | None/Blood pressure decrease requiring intervention/Disequilibrium syndrome/Anaphylaxis/Cardiopulmonary arrest/Others                      | Select all adverse events immediately after CRRT initiation that apply. If "Others" is selected, provide details in the free description. |
| Dopamine ( $\gamma$ )                                      | Numeric  |                                                                                                                                            | Max dose up to 1 hour after CRRT initiation. Integer only.                                                                                |
| Dobutamine ( $\gamma$ )                                    | Numeric  |                                                                                                                                            | Max dose up to 1 hour after CRRT initiation. Integer only.                                                                                |

|                                               |          |                                                                                                                                                                                                                       |                                                                                                                                        |
|-----------------------------------------------|----------|-----------------------------------------------------------------------------------------------------------------------------------------------------------------------------------------------------------------------|----------------------------------------------------------------------------------------------------------------------------------------|
| Milrinone ( $\gamma$ )                        | Numeric  |                                                                                                                                                                                                                       | Max dose up to 1 hour after CRRT initiation. Enter to the first decimal place.                                                         |
| Adrenaline ( $\gamma$ )                       | Numeric  |                                                                                                                                                                                                                       | Max dose up to 1 hour after CRRT initiation. Enter to the second decimal place.                                                        |
| Noradrenaline ( $\gamma$ )                    | Numeric  |                                                                                                                                                                                                                       | Max dose up to 1 hour after CRRT initiation. Enter to the second decimal place.                                                        |
| Vasopressin (mU/kg/min)                       | Numeric  |                                                                                                                                                                                                                       | Max dose up to 1 hour after CRRT initiation. Enter to the first decimal place.                                                         |
| Initial settings – Qb (mL/min)                |          |                                                                                                                                                                                                                       |                                                                                                                                        |
| Initial settings – Qd (mL/hour)               |          |                                                                                                                                                                                                                       |                                                                                                                                        |
| Initial settings – Qs (mL/hour)               |          |                                                                                                                                                                                                                       |                                                                                                                                        |
| Max – Qd (mL/hour)                            |          |                                                                                                                                                                                                                       | Max setting before first circuit exchange                                                                                              |
| Max – Qs (mL/hour)                            |          |                                                                                                                                                                                                                       | Max setting before first circuit exchange                                                                                              |
| Date of first circuit exchange                | YY/MM/DD |                                                                                                                                                                                                                       |                                                                                                                                        |
| Time of first circuit exchange                | HH:MM    |                                                                                                                                                                                                                       |                                                                                                                                        |
| Reason for first circuit exchange             | 7 levels | CRRT terminated/Preventive replacement before blockage/Exchange at regular time intervals/Exchange at blockage/Disconnection for more than 60 minutes for procedures or tests/Along with ECMO circuit exchange/Others | If “others” is selected, provide details in the free description.                                                                      |
| Anticoagulants used in the first circuit      | 6 levels | Nafamostat/Unfractionated heparin/Low-molecular-weight heparin/Argatroban/None/Others                                                                                                                                 | Select all that apply.                                                                                                                 |
| Anticoagulant monitoring in the first circuit | 6 levels | ACT/APTT/Thromboelastography/anti-Xa/Others/None                                                                                                                                                                      | Select all that apply. If “others” is selected, provide details in the free description.                                               |
| <b>Information during CRRT</b>                |          |                                                                                                                                                                                                                       |                                                                                                                                        |
| <b>Adverse events</b>                         |          |                                                                                                                                                                                                                       |                                                                                                                                        |
| Intracranial bleeding                         | 3 levels | None/Minor bleeding not requiring intervention/Serious bleeding requiring intervention                                                                                                                                | Select "None" if you have not taken any imaging tests. Interventions include, for example, surgical procedures and blood transfusions. |
| Non-intracranial bleeding                     | 3 levels | None/Minor bleeding not requiring intervention/Serious bleeding requiring intervention                                                                                                                                | Interventions include, for example, surgical procedures and blood transfusions.                                                        |
| Adverse events related to vascular access     | 8 levels | None/Bleeding requiring intervention during insertion · arterial misperforation/CRBSI/ Cardiac tamponade/ Arrhythmia requiring intervention/ Hemothorax/Accidental catheter removal/                                  | Select all that apply. If “others” is selected, provide details in the free description.                                               |

|                                                                        |                  |                                                                                                                                                               |                                                                                                                                                                                                                                                                                                                                                                                                                                                              |
|------------------------------------------------------------------------|------------------|---------------------------------------------------------------------------------------------------------------------------------------------------------------|--------------------------------------------------------------------------------------------------------------------------------------------------------------------------------------------------------------------------------------------------------------------------------------------------------------------------------------------------------------------------------------------------------------------------------------------------------------|
|                                                                        |                  | Others                                                                                                                                                        |                                                                                                                                                                                                                                                                                                                                                                                                                                                              |
| Other CRRT-related adverse events                                      | 8 levels         | None/Thromboembolism/Air embolism/Blood loss due to accidental circuit disconnection/Hypothermia below 35 degrees Celsius/Fall from bed/Cardiac arrest/Others | Select all that apply. If “others” is selected, provide details in the free description.                                                                                                                                                                                                                                                                                                                                                                     |
| Rehabilitation                                                         | 3 levels         | None/Modest rehabilitation/Aggressive rehabilitation                                                                                                          | Select the most appropriate level of attempted rehabilitation during CRRT. If moderate or aggressive rehabilitation is selected, at least one rehabilitation must have been performed during CRRT. If rehabilitation was attempted but could not be performed, select None. Modest rehabilitation means only in-bed interventions such as ROM. Active rehabilitation means the same level of rehabilitation as is performed when the patient is not on CRRT. |
| Sedation and analgesia management                                      | 8 levels         | None/Midazolam/Fentanyl/Dexmedetomidine/Morphine/Ketamine/Muscle relaxant/Oral sedative                                                                       | Select the sedatives and analgesics regularly used to achieve the sedation target in the following section. Do not include single use only. For intravenous drugs and muscle relaxant, it means continuous administration.                                                                                                                                                                                                                                   |
| Sedation target (assessed using the Richmond Agitation-Sedation Scale) | 9 levels         | No target/-5/-4/-3/-2/-1/0/+1/+2                                                                                                                              |                                                                                                                                                                                                                                                                                                                                                                                                                                                              |
| Total CRRT days (day)                                                  | Numeric          |                                                                                                                                                               | Integer only.                                                                                                                                                                                                                                                                                                                                                                                                                                                |
| <b>Information at the time of PICU discharge</b>                       |                  |                                                                                                                                                               |                                                                                                                                                                                                                                                                                                                                                                                                                                                              |
| PICU discharge date                                                    | YY/MM/DD         |                                                                                                                                                               |                                                                                                                                                                                                                                                                                                                                                                                                                                                              |
| PICU diagnosis                                                         | Free description |                                                                                                                                                               |                                                                                                                                                                                                                                                                                                                                                                                                                                                              |
| PCPC                                                                   | 6 levels         | 1/2/3/4/5/Death                                                                                                                                               |                                                                                                                                                                                                                                                                                                                                                                                                                                                              |
| Serum creatinine (mg/dL)                                               | Numeric          |                                                                                                                                                               | Enter to the first decimal place. Enter data closest to the time of PICU discharge.                                                                                                                                                                                                                                                                                                                                                                          |
| Renal replacement therapy dependence                                   | 3 levels         | None/Yes (peritoneal dialysis)/Yes (intermittent hemodialysis)                                                                                                | Enter “None” for death.                                                                                                                                                                                                                                                                                                                                                                                                                                      |
| <b>Information at 6 months after PICU discharge</b>                    |                  |                                                                                                                                                               |                                                                                                                                                                                                                                                                                                                                                                                                                                                              |
| PCPC                                                                   | 7 levels         | 1/2/3/4/5/Death/Unknown                                                                                                                                       |                                                                                                                                                                                                                                                                                                                                                                                                                                                              |
| Serum creatinine (mg/dL)                                               | Numeric          |                                                                                                                                                               | Enter to the first decimal place. Enter the value closest to 6 months                                                                                                                                                                                                                                                                                                                                                                                        |

|                                      |          |                                                                              |                                                                               |
|--------------------------------------|----------|------------------------------------------------------------------------------|-------------------------------------------------------------------------------|
|                                      |          |                                                                              | among those measured between 3–6 months from PICU discharge.                  |
| Renal replacement therapy dependence | 5 levels | None/Yes (peritoneal dialysis)/Yes (intermittent hemodialysis)/Unknown/Death | Enter “None” for death.                                                       |
| Unscheduled PICU readmission         | 4 levels | No/Yes/Unknown/Death                                                         | Enter whether unscheduled PICU readmission within 6 months of PICU discharge. |

PICU, pediatric intensive care unit; PIM3, Pediatric Index of Mortality 3; pSOFA, Pediatric Sequential Organ Failure Assessment; PCPC, Pediatric Cerebral Performance Category Scale; CRRT, continuous renal replacement therapy; ECMO, extracorporeal membrane oxygenation; BGA, blood gas analysis; PT, Prothrombin time; APTT, activated partial thromboplastin time; Qb, blood flow rate; Qd, dialysis fluid rate; Qs, replacement fluid rate; ACT, activated clotting time; CVVHD, continuous venovenous hemodialysis; CVVHDF, continuous venovenous hemodiafiltration; CVVH, continuous venovenous hemofiltration; ECUM, extracorporeal ultrafiltration method; PS, Polysulfone; CTA, cellulose triacetate; PMMA, polymethylmethacrylate; PAN, polyacrylonitrile; BGA, blood gas analysis; ACT, activated clotting time; APTT, activated partial thromboplastin time; Qb, blood flow rate; Qd, dialysis fluid rate; Qs, replacement fluid rate; CRBSI, catheter related blood stream infection; ROM, range of motion.
